# Supplementary material
Source: PubMed Central journal article supplement (PMC1564223)

Fig. 8

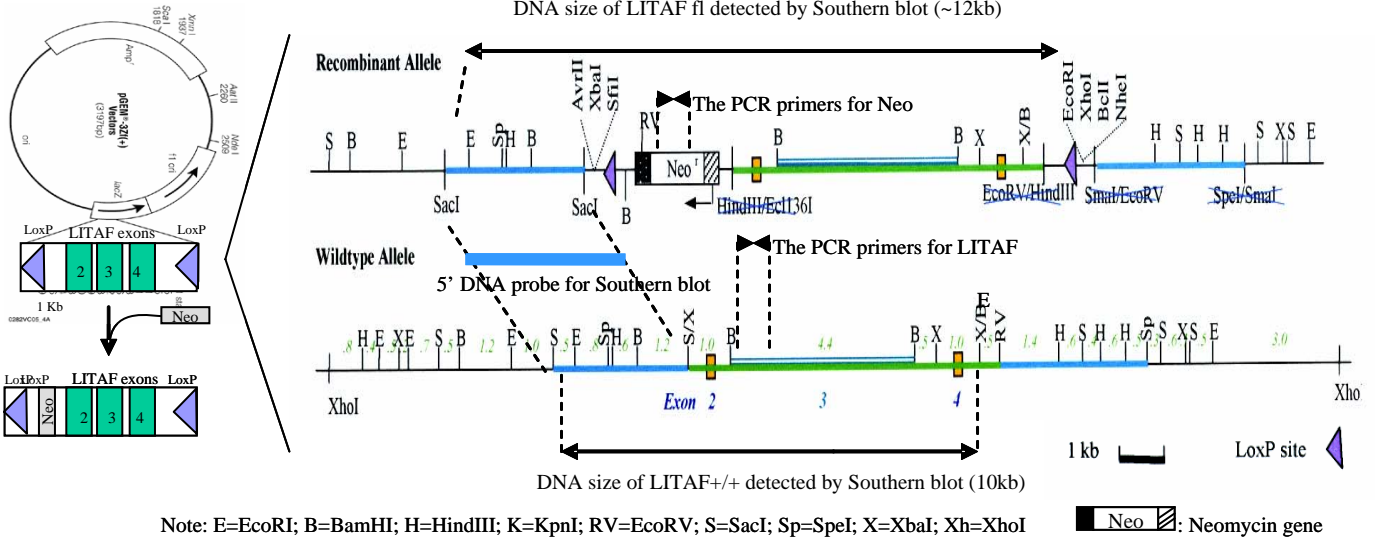

( a )

Supplement: pnas_0605988103_1.pdf [file pnas_0605988103_1.pdf]

Mouse  
Macrophages

*P.g.* LPS  
*E.coli* LPS

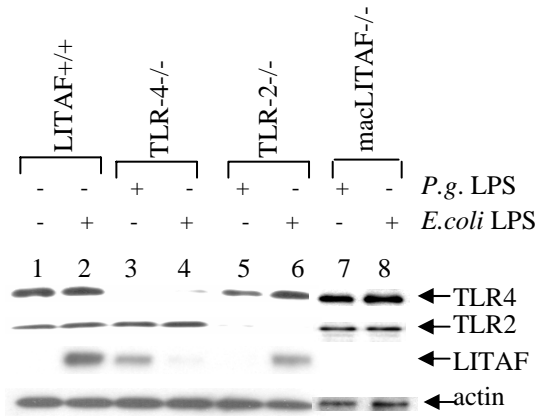

Supplement: pnas_0605988103_2.pdf [file pnas_0605988103_2.pdf]
